# Supplementary material for: Seasonal Shifts in Soil Microbiome Structure Are Associated with the Cultivation of the Local Runner Bean Variety around the Lake Mikri Prespa
Source: MDPI journal article supplement (doi:10.3390/biology11111595), 2022-10-31
Supplement: s1 [file s1]

# Supplementary Materials

## Seasonal Shifts in Soil Microbiome Structure Are Associated with the Cultivation of the Local Runner Bean Variety around the Lake Mikri Prespa

Evangelia Stavridou <sup>1</sup>, Ioanna Karamichali <sup>1</sup>, Georgios Lagiotis <sup>1</sup>, Elena Patsea <sup>2</sup>, Maslin Osathanunkul <sup>3,4</sup> and Panagiotis Madesis <sup>1,5,\*</sup>

<sup>1</sup> Institute of Applied Biosciences, Centre for Research and Technology, 57001 Thessaloniki, Greece

<sup>2</sup> A.S. “PELEKANOS”, Epar.Od. Lemou-Vronterou, 53077 Prespes, Greece; epatsea90@gmail.com

<sup>3</sup> Department of Biology, Faculty of Science, Chiang Mai University, Chiang Mai 50200, Thailand; omaslin@gmail.com

<sup>4</sup> Research Centre on Bioresources for Agriculture, Industry and Medicine, Chiang Mai University, Chiang Mai 50200, Thailand

<sup>5</sup> Laboratory of Molecular Biology of Plants, School of Agricultural Sciences, University of Thessaly, 38446 Volos, Greece

\* Correspondence: pmadesis@uth.gr

**Table S1.** Read counts, contigs and OTUs of the nine experimental field sites around the lake Mikri Prespa and the sampling periods in three time points (seasons/cultivation period), i.e. spring (before cultivation), summer (during cultivation) and autumn (after cultivation).

| Field | Field Repeat | Season | Season repeat | Sample           | Reads   | Contigs | OTUs   |
|-------|--------------|--------|---------------|------------------|---------|---------|--------|
| F1    | F1_1         | Summer | Summer_1      | F1_1_S1_R1_001   | 184986  | 48415   | 48305  |
|       |              |        |               | F1_1_S1_R2_001   | 184986  |         |        |
|       | F1_2         | Autumn | Autumn_1      | F1_2_S12_R1_001  | 37473   | 14451   | 14337  |
|       |              |        |               | F1_2_S12_R2_001  | 37473   |         |        |
|       | F1_3         | Spring | Spring_1      | F1_3_S29_R1_001  | 28477   | 10351   | 10336  |
|       |              |        |               | F1_3_S29_R2_001  | 28477   |         |        |
| F2    | F2_1         | Summer | Summer_2      | F2_1_S2_R1_001   | 39797   | 11279   | 11186  |
|       |              |        |               | F2_1_S2_R2_001   | 39797   |         |        |
|       | F2_2         | Autumn | Autumn_2      | F2_2_S13_R1_001  | 37216   | 16716   | 16593  |
|       |              |        |               | F2_2_S13_R2_001  | 37216   |         |        |
|       | F2_3         | Spring | Spring_2      | F2_3_S25_R1_001  | 26700   | 9791    | 9744   |
|       |              |        |               | F2_3_S25_R2_001  | 26700   |         |        |
| F3    | F3_1         | Summer | Summer_3      | F3_1_S3_R1_001   | 48050   | 11085   | 11041  |
|       |              |        |               | F3_1_S3_R2_001   | 48050   |         |        |
|       | F3_2         | Autumn | Autumn_3      | F3_2_S14_R1_001  | 31503   | 8332    | 8316   |
|       |              |        |               | F3_2_S14_R2_001  | 31503   |         |        |
|       | F3_3         | Spring | Spring_3      | F3_3_S28_R1_001  | 31961   | 15026   | 14983  |
|       |              |        |               | F3_3_S28_R2_001  | 31961   |         |        |
| F4    | F4_1         | Summer | Summer_4      | F4_1_S4_R1_001   | 59859   | 25670   | 24830  |
|       |              |        |               | F4_1_S4_R2_001   | 59859   |         |        |
|       | F4_2         | Autumn | Autumn_4      | F4_2_S15_R1_001  | 26200   | 8212    | 8176   |
|       |              |        |               | F4_2_S15_R2_001  | 26200   |         |        |
|       | F4_3         | Spring | Spring_4      | F4_3_S27_R1_001  | 35632   | 17124   | 17099  |
|       |              |        |               | F4_3_S27_R2_001  | 35632   |         |        |
| F5    | F5_1         | Summer | Summer_5      | F5_1_S5_R1_001   | 107034  | 47076   | 46852  |
|       |              |        |               | F5_1_S5_R2_001   | 107034  |         |        |
|       | F5_2         | Autumn | Autumn_5      | F5_2_S16_R1_001  | 31444   | 6457    | 6436   |
|       |              |        |               | F5_2_S16_R2_001  | 31444   |         |        |
|       | F5_3         | Spring | Spring_5      | F5_3_S24_R1_001  | 24012   | 9965    | 9946   |
|       |              |        |               | F5_3_S24_R2_001  | 24012   |         |        |
| F6    | F6_1         | Summer | Summer_6      | F6_1_S6_R1_001   | 35271   | 13217   | 13091  |
|       |              |        |               | F6_1_S6_R2_001   | 35271   |         |        |
|       | F6_2         | Autumn | Autumn_6      | F6_2_S17_R1_001  | 33399   | 15732   | 15663  |
|       |              |        |               | F6_2_S17_R2_001  | 33399   |         |        |
|       | F6_3         | Spring | Spring_6      | F6_3_S23_R1_001  | 43542   | 17588   | 17544  |
|       |              |        |               | F6_3_S23_R2_001  | 43542   |         |        |
| F7    | F7_1         | Summer | Summer_7      | F7_1_S7_R1_001   | 36101   | 10719   | 10660  |
|       |              |        |               | F7_1_S7_R2_001   | 36101   |         |        |
|       | F7_2         | Autumn | Autumn_7      | F7_2_S18_R1_001  | 31349   | 10390   | 10343  |
|       |              |        |               | F7_2_S18_R2_001  | 31349   |         |        |
|       | F7_3         | Spring | Spring_7      | F7_3_S26_R1_001  | 27167   | 6797    | 6777   |
|       |              |        |               | F7_3_S26_R2_001  | 27167   |         |        |
| F9    | F9_1         | Summer | Summer_8      | F9_1_S9_R1_001   | 102016  | 20412   | 20365  |
|       |              |        |               | F9_1_S9_R2_001   | 102016  |         |        |
|       | F9_2         | Autumn | Autumn_8      | F9_2_S20_R1_001  | 24972   | 7166    | 7122   |
|       |              |        |               | F9_2_S20_R2_001  | 24972   |         |        |
|       | F9_3         | Spring | Spring_8      | F9_3_S31_R1_001  | 27536   | 8134    | 8122   |
|       |              |        |               | F9_3_S31_R2_001  | 27536   |         |        |
| F11   | F11_1        | Summer | Summer_9      | F11_1_S11_R1_001 | 97373   | 48014   | 47830  |
|       |              |        |               | F11_1_S11_R2_001 | 97373   |         |        |
|       | F11_2        | Autumn | Autumn_9      | F11_2_S22_R1_001 | 27807   | 10509   | 10491  |
|       |              |        |               | F11_2_S22_R2_001 | 27807   |         |        |
|       | F11_3        | Spring | Spring_9      | F11_3_S30_R1_001 | 28738   | 12034   | 12004  |
|       |              |        |               | F11_3_S30_R2_001 | 28738   |         |        |
| Total |              |        |               |                  | 2531230 | 440662  | 438192 |

**Table S2.** Proportion of inertia explained by constrained and unconstrained ordination based on the canonical correspondence analysis (CCA) of the relative variance of OTUs in the soil samples representing the effect of runner bean cultivation period on the bacterial community abundance for nine sites (F1-F11) over three different seasons.

|               | Inertia | Proportion |
|---------------|---------|------------|
| Total         | 7.5983  | 1          |
| Constrained   | 3.1021  | 0.4083     |
| Unconstrained | 4.4962  | 0.5917     |

**Table S3.** Accumulated constrained eigenvalues based on the canonical correspondence analysis (CCA) of the relative variance of OTUs in the soil samples representing the effect of runner bean cultivation period on the bacterial community abundance for nine sites (F1-F11) over three different seasons.

| Importance of components | CCA1          | CCA2          | CCA3   | CCA4   | CCA5   | CCA6   | CCA7    | CCA8   | CCA9    | CCA10   |
|--------------------------|---------------|---------------|--------|--------|--------|--------|---------|--------|---------|---------|
| Eigenvalue               | 0.4391        | 0.3982        | 0.3621 | 0.3193 | 0.3117 | 0.2916 | 0.28124 | 0.2562 | 0.22977 | 0.21286 |
| Proportion Explained     | <b>0.1416</b> | <b>0.1284</b> | 0.1167 | 0.1029 | 0.1005 | 0.094  | 0.09066 | 0.0826 | 0.07407 | 0.06862 |
| Cumulative Proportion    | 0.1416        | 0.2699        | 0.3866 | 0.4896 | 0.5901 | 0.6841 | 0.77471 | 0.8573 | 0.93138 | 1       |

**Table S4.** Biplot scores for constraining variables based on the canonical correspondence analysis (CCA) of the relative variance of OTUs in the soil samples representing the effect of runner bean cultivation period on the bacterial community abundance for nine sites (F1-F11) over three different seasons.

| Variables | CCA1   | CCA2      | CCA3    | CCA4     | CCA5     | CCA6     |
|-----------|--------|-----------|---------|----------|----------|----------|
| F11       | 0.4152 | 0.252321  | 0.2192  | -0.57993 | 0.53559  | -0.03167 |
| F2        | 0.1493 | -0.085771 | -0.162  | -0.35022 | -0.76966 | 0.336724 |
| F3        | -0.095 | -0.823502 | 0.5408  | 0.09075  | 0.0855   | -0.03669 |
| F4        | 0.1418 | -0.031835 | -0.1672 | -0.06591 | -0.00521 | -0.00903 |
| F5        | 0.093  | 0.03013   | -0.2539 | 0.3827   | 0.18293  | 0.361257 |
| F6        | 0.1033 | 0.002217  | -0.21   | -0.07168 | 0.04216  | -0.07322 |
| F7        | 0.1873 | 0.113367  | -0.141  | 0.38648  | -0.1745  | -0.80536 |
| F9        | -0.766 | 0.412016  | 0.241   | -0.06224 | 0.01566  | 0.003764 |
| Summer_DC | -0.402 | -0.218706 | -0.3157 | -0.49499 | -0.02392 | -0.36332 |
| Autumn_AC | 0.0677 | -0.173841 | -0.3759 | 0.2423   | 0.3428   | 0.269503 |

**Table S5.** Relative abundance (%) of bacterial genera at rate greater than 1%, for the different seasons over all fields. Phyla and classes indicative of the genera are also shown. NA indicates absence of the genera from the respective season.

| Phylum                        | Class                       | Genus (%)                                 | Seasons                   |             |             |
|-------------------------------|-----------------------------|-------------------------------------------|---------------------------|-------------|-------------|
|                               |                             |                                           | Spring_BC                 | Summer_DC   | Autumn_AC   |
| Acidobacteria                 | Acidobacteriia              | Acidobacteriales_unclassified             | 1.4328557                 | NA          | NA          |
|                               |                             | Bryobacter                                | 0.469525711               | 1.178240744 | 1.550811822 |
|                               |                             | Solibacteraceae_(Subgroup_3)_unclassified | 2.2742419                 | NA          | NA          |
|                               | Blastocatellia_(Subgroup_4) | Blastocatellaceae_unclassified            | 0.6555462                 | 1.144294478 | 1.1448426   |
|                               |                             | RB41                                      | 2.597913011               | 1.9050397   | 2.498550822 |
|                               |                             | uncultured                                | NA                        | NA          | 1.0885519   |
|                               | Holophagae                  | Subgroup_7_ge                             | 1.202135067               | 0.372107567 | NA          |
|                               | Subgroup_6                  | Subgroup_6_ge                             | 8.547790467               | 5.293898278 | 7.136563711 |
|                               |                             | Subgroup_6_unclassified                   | 0.503095967               | 0.889362933 | 1.199608733 |
|                               | Acidimicrobiia              | Acidimicrobiia_unclassified               | NA                        | 0.558073625 | 0.883348325 |
|                               | Actinobacteria              | Frankiales_unclassified                   | NA                        | 1.0269835   | NA          |
|                               |                             | Geodermatophilaceae_unclassified          | NA                        | 1.7762136   | NA          |
|                               |                             | Intrasporangiaceae_unclassified           | NA                        | 1.0727695   | NA          |
|                               |                             | Micrococcaceae_unclassified               | NA                        | 1.463790517 | 0.978333583 |
|                               |                             | Nocardiodaceae_unclassified               | NA                        | 0.947695633 | 0.389957767 |
|                               |                             | Nocardioiodes                             | NA                        | 1.5626259   | NA          |
|                               |                             | Streptomyces                              | NA                        | 0.55104605  | 0.92447905  |
|                               | Rubrobacteria               | Rubrobacter                               | NA                        | NA          | 1.0671689   |
|                               | Thermoleophilia             | Solirubrobacter                           | NA                        | 1.00349405  | 0.2892812   |
|                               |                             | uncultured_ge                             | 1.2412529                 | NA          | NA          |
| Bacteria_unclassified         | Bacteria_unclassified       | Bacteria_unclassified                     | 5.748871144               | 4.894200233 | 4.737870267 |
| Bacteroidetes                 | Bacteroidia                 | Chitinophaga                              | NA                        | NA          | 1.1021947   |
|                               |                             | Chitinophagaceae_unclassified             | 2.4928394                 | 3.374419889 | 3.087625667 |
|                               |                             | Cytophagales_unclassified                 | NA                        | 0.8396759   | 1.37458715  |
|                               |                             | Flavobacterium                            | 1.331516275               | NA          | NA          |
|                               |                             | Pedobacter                                | NA                        | NA          | 1.2568887   |
|                               |                             | uncultured                                | 1.328241857               | 0.251832629 | 0.725857771 |
| Chloroflexi                   | Anaerolineae                | uncultured                                | NA                        | NA          | 1.053075    |
|                               | Chloroflexia                | Roseiflexaceae_unclassified               | NA                        | 0.5920258   | 0.51075785  |
|                               | KD4-96                      | KD4-96_ge                                 | 0.6135054                 | 0.78112056  | 0.22607022  |
|                               | Cyanobacteria               | Oxyphotobacteria                          | Leptolyngbya_EcFYyy-00    | NA          | 1.4740234   |
| Nostocales_unclassified       |                             |                                           | NA                        | NA          | 1.5972658   |
| Firmicutes                    | Bacilli                     | Bacillales_unclassified                   | NA                        | 1.5074883   | NA          |
|                               |                             | Bacillus                                  | 0.8187228                 | 2.033904444 | 1.392081489 |
| Gemmatimonadetes              | Gemmatimonadetes            | Gemmatimonas                              | 0.711409657               | 1.244670086 | 1.218726771 |
|                               |                             | uncultured                                | 1.620751744               | 0.127661044 | 0.911054578 |
| Nitrospirae                   | Nitrospira                  | Nitrospira                                | 1.3455842                 | NA          | 0.53511305  |
| Patescibacteria               | Parcubacteria               | Parcubacteria_unclassified                | 1.771971725               | NA          | 0.253118775 |
|                               | Saccharimonadia             | Saccharimonadales_ge                      | NA                        | NA          | 1.16072985  |
| Planctomycetes                | Phycisphaerae               | WD2101_soil_group_ge                      | 4.742002744               | 6.883394511 | 6.554805656 |
|                               | Planctomycetacia            | Pirellulaceae_unclassified                | 1.269961283               | 0.174318683 | 0.51744505  |
|                               |                             | Planctomycetacia_unclassified             | 1.387598571               | 0.197818386 | 0.3099332   |
| Proteobacteria                | Alphaproteobacteria         | Alphaproteobacteria_unclassified          | 1.578354611               | 1.688417689 | 1.811244078 |
|                               |                             | Candidatus_Alysiosphaera                  | NA                        | 1.6602836   | NA          |
|                               |                             | Rhizobiales_unclassified                  | 1.0612027                 | NA          | NA          |
|                               |                             | Sphingomonadaceae_unclassified            | 0.924932175               | 2.534326663 | 1.383436038 |
|                               |                             | Sphingomonas                              | 6.0517973                 | 8.487490844 | 7.084360667 |
|                               |                             | uncultured                                | 1.23446204                | NA          | 0.513555    |
|                               |                             | Deltaproteobacteria                       | Myxococcales_unclassified | 1.193315825 | 0.28602995  |
|                               | Gammaproteobacteria         | Burkholderiaceae_unclassified             | 1.044504022               | 1.731195511 | 1.3471827   |
|                               |                             | Ellin6067                                 | NA                        | NA          | 1.1152416   |
|                               |                             | Gammaproteobacteria_unclassified          | 1.2435361                 | NA          | NA          |
|                               |                             | Massilia                                  | 0.3359363                 | 1.1979706   | NA          |
|                               |                             | SC-I-84_ge                                | 0.47205594                | 0.41179532  | 0.99438146  |
|                               |                             | Stenotrophomonas                          | NA                        | NA          | 1.0245284   |
|                               |                             | Steroidobacter                            | 1.1327259                 | NA          | NA          |
| Xanthomonadaceae_unclassified | 1.1113216                   | 1.152154125                               | 0.664250475               |             |             |
| Verrucomicrobia               | Verrucomicrobiae            | Candidatus_Udaeobacter                    | 2.288903                  | 1.164951038 | 1.456827775 |
|                               |                             | Pedosphaeraceae_ge                        | 0.47718476                | 0.22138836  | 0.44101572  |
|                               |                             | Pedosphaeraceae_unclassified              | 1.333414025               | NA          | 0.2859594   |
|                               |                             | Verrucomicrobiae_unclassified             | 1.028037029               | 0.183596886 | 0.722070914 |
|                               |                             | SUM                                       | 66.61901705               | 65.84179053 | 66.52075418 |

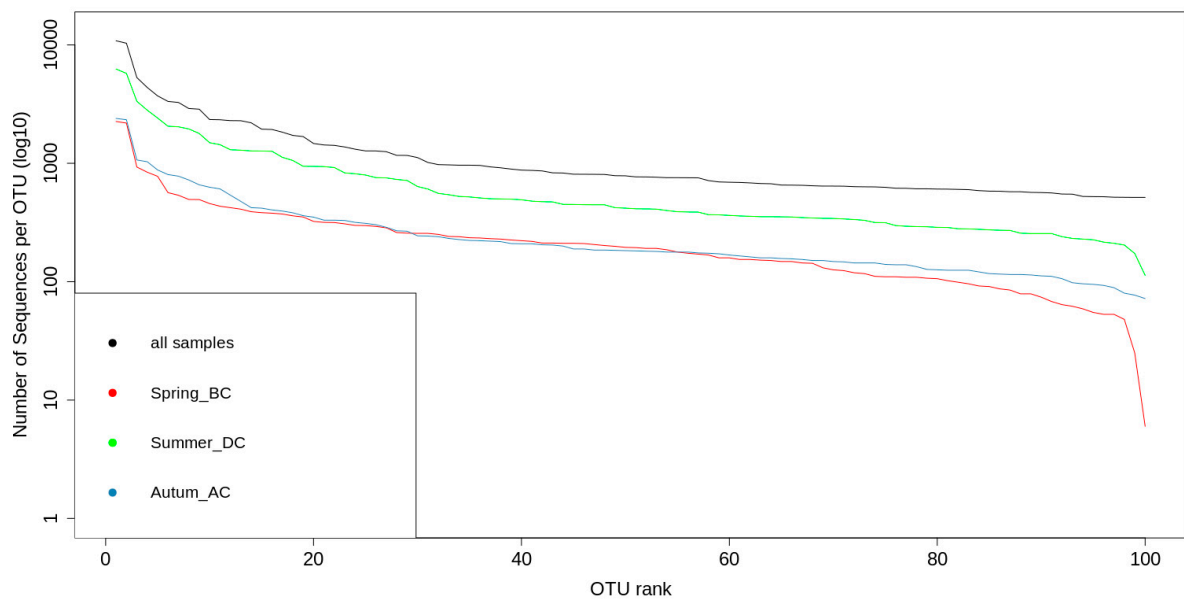

**Figure S1.** Rank abundance curves. Abundances of the top 100 OTUs for bacterial communities in the three seasons. Spring, summer and autumn correspond to the field conditions before, during and after cultivation of the runner bean, respectively.

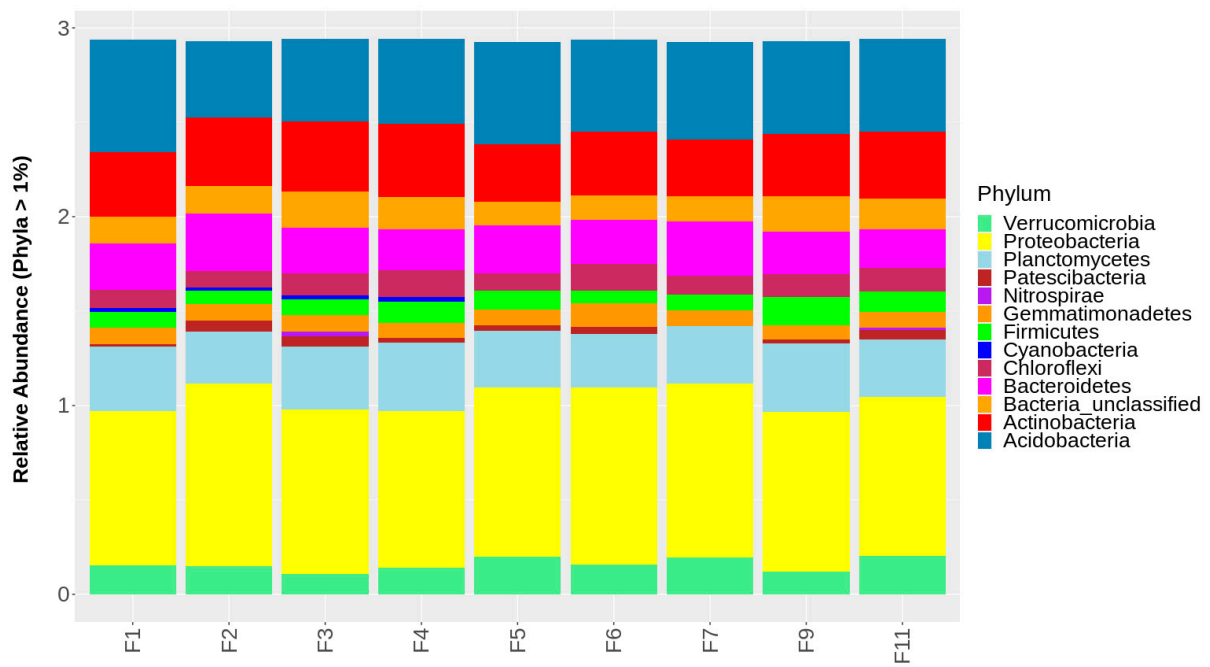

**Figure S2.** Abundance (%) of representative phyla of the bacterial community present in the different fields (F1-F11) across three different seasons (spring, summer, autumn). The different phyla are depicted with different colours.

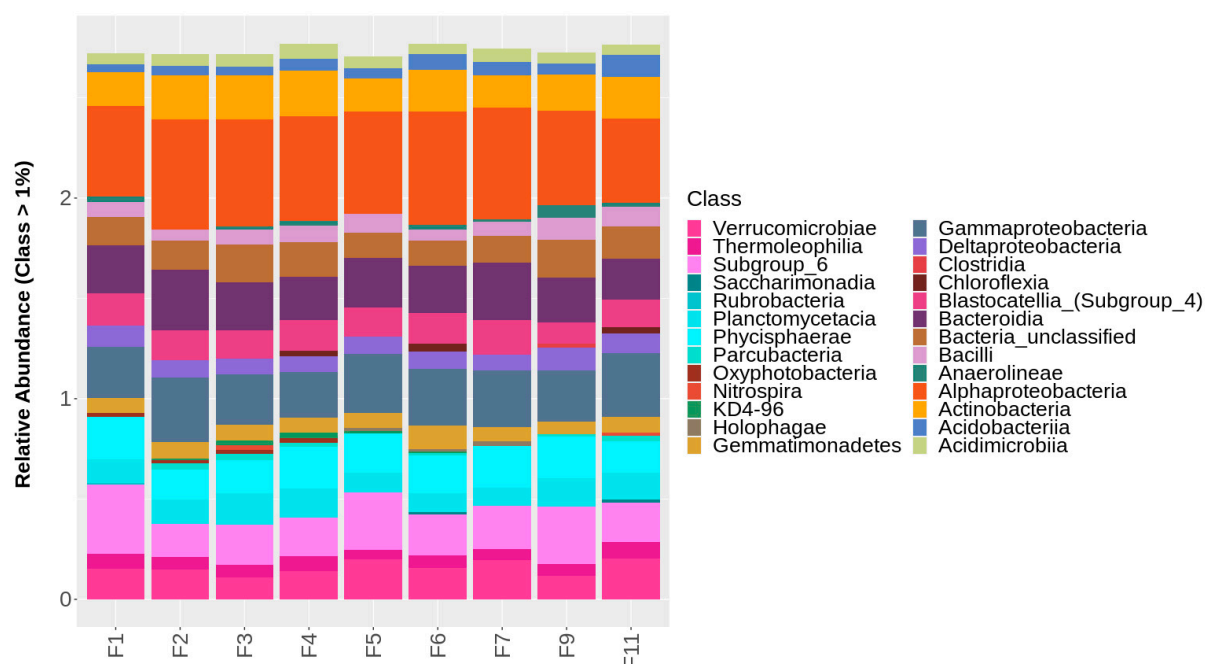

**Figure S3.** Abundance (%) of representative classes of the bacterial community present in the different fields (F1-F11) across three different seasons (spring, summer, autumn). The different phyla are depicted with different colours.

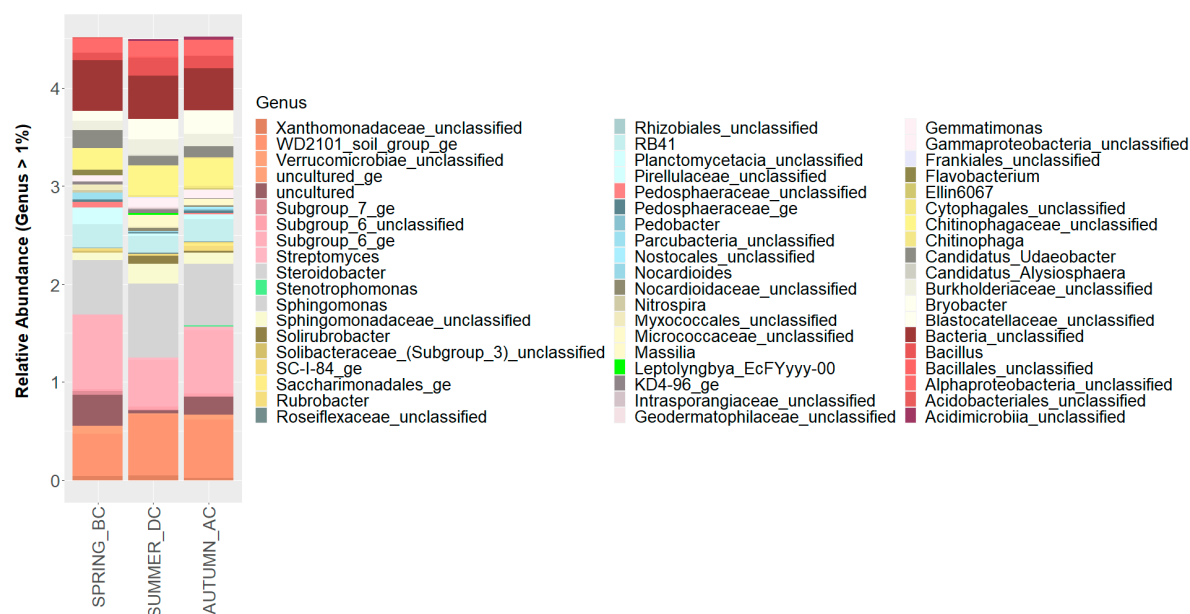

**Figure S4.** Classification of bacterial genera based on relative abundance at rate greater than 1% over three seasons: Spring\_before cultivation (BC), Summer\_during cultivation (DC), Autumn\_after cultivation (AC) of the runner bean crop across the soil samples of nine field sites. The different genera are depicted in different colours.

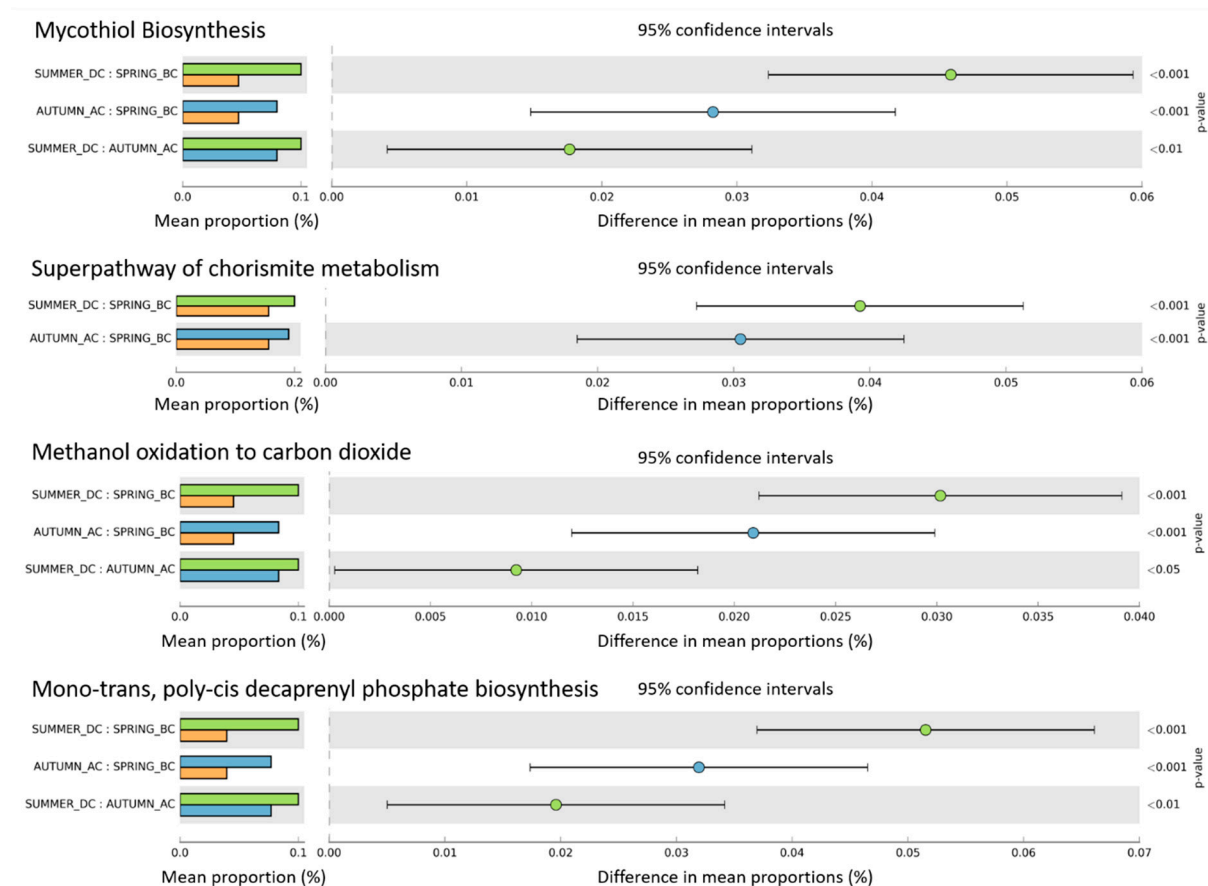

**Figure S5.** Post-hoc plots for the predicted pathways demonstrating greater abundance of sequences (%) in different seasons (Spring\_BC, Summer\_DC and Autumn\_AC) across all field sites, indicating: i) the mean proportion of sequences within each season, ii) the difference in mean proportions for each pair, and iii) a *p*-value indicating whether the mean proportion is equal for a given pair. The analysis was performed in the STAMP software using ANOVA with *p*-value  $\leq 0.05$  and effect size  $>0.75$ .
